# Supplementary material
Source: PubMed Central journal article supplement (PMC3727326)
Supplement: d-69-01414-sup1.pdf [file d-69-01414-sup1.pdf]

## Supplementary Material

**Supplementary Figure S1.** Schematic of the five  $\chi$  angles of the disulfide bond.

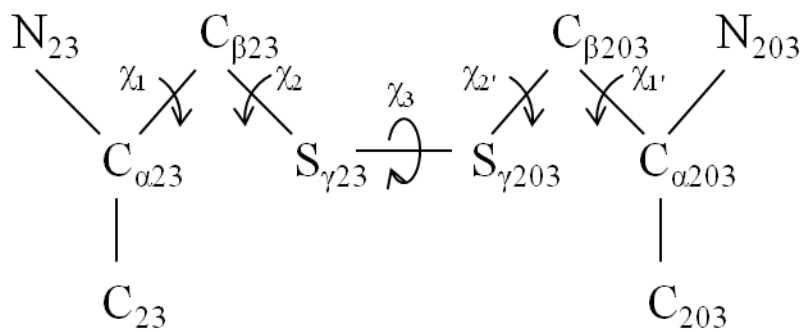

**Supplementary Figure S2.** Overlay of the disulfide linkage of dsHCAII with other CAs where this linkage is conserved. The C<sub>α</sub> backbone for dsHCAII is represented by a blue-white cartoon and the disulfide linkage is shown in stick view. The carbons of the disulfide bond are color-coded according to CA isoforms as: HCAIV – orange; HCAVI – dark blue; HCAIX – red; HCAXII – cyan; mCAXIV – magenta; *N. gonorrhoeae* – pink). The various isoforms were aligned to the dsHCAII structure in Coot (Emsley & Cowtan, 2004). The residues for the disulfide linkage are numbered according to their positions in dsHCAII.

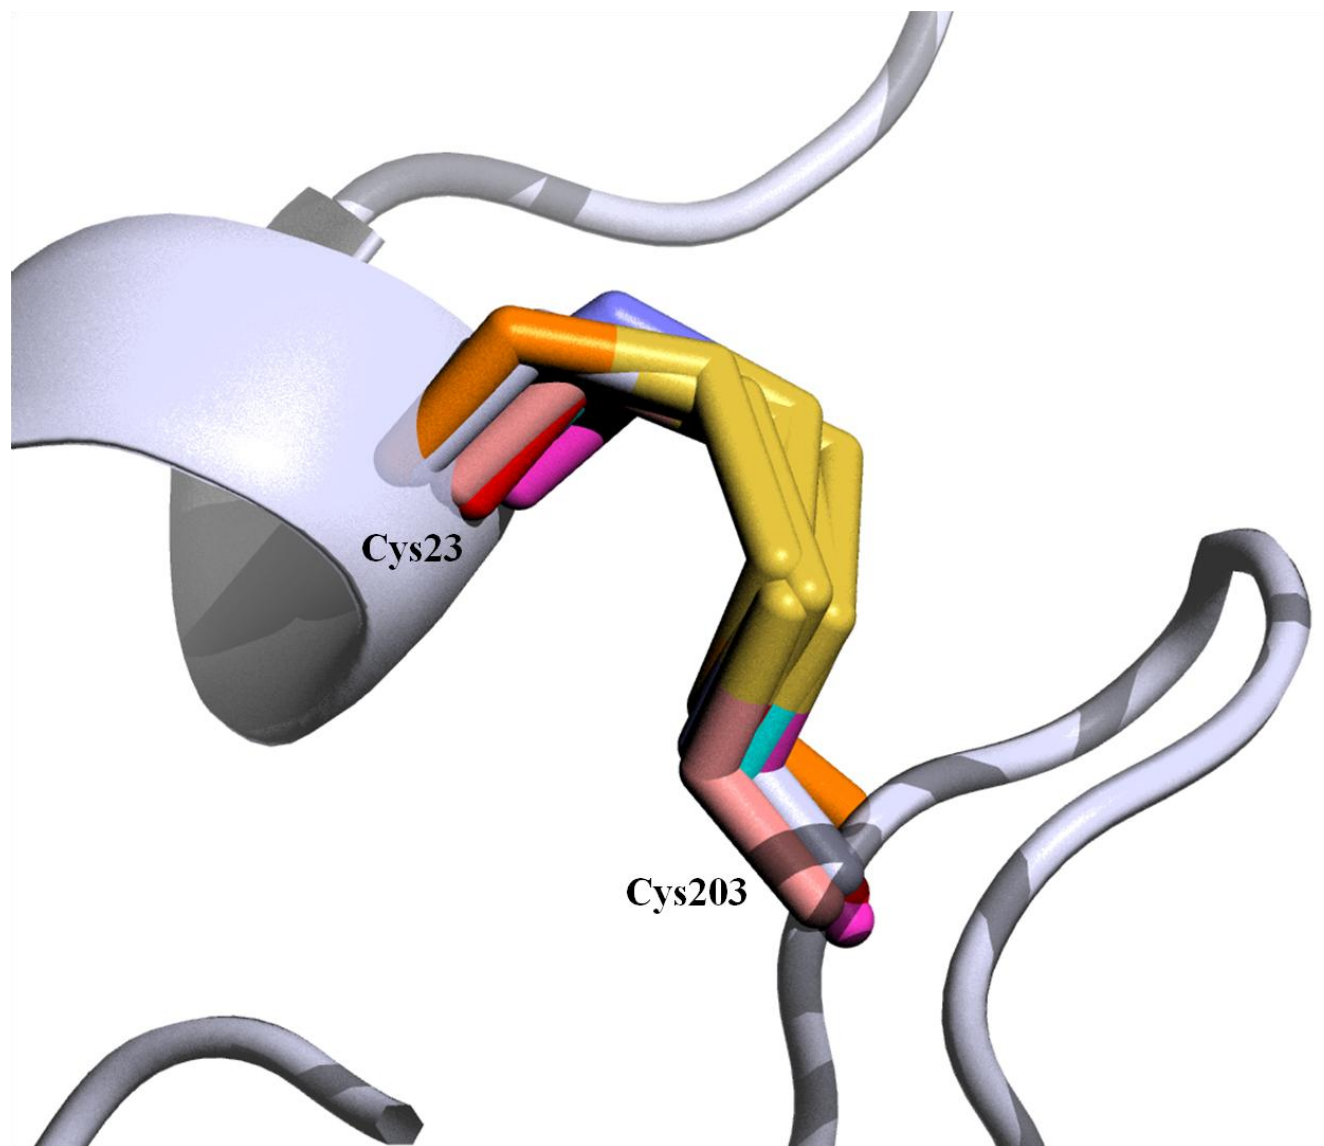

**Supplementary Table S1.** Geometric comparison and strain energy of the conserved disulfide linkage between residues 23 and 203 in various CAs.

|                                          | dsHCAII       | HCAIV <sup>a</sup> | HCAVI <sup>b</sup> | HCAIX <sup>c</sup> | HCAXII <sup>d</sup> | mCAXIV <sup>e</sup> | NGCA <sup>f</sup> |
|------------------------------------------|---------------|--------------------|--------------------|--------------------|---------------------|---------------------|-------------------|
| $\chi_1$ (°)                             | 162.25        | -55.86             | -53.73             | -175.16            | 172.73              | -71.99              | -63.26            |
| $\chi_2$ (°)                             | -54.34        | -56.34             | 119.82             | 111.37             | -60.43              | -54.06              | -63.42            |
| $\chi_3$ (°)                             | 79.80         | 78.68              | 82.77              | 87.00              | 87.07               | 86.64               | 94.47             |
| $\chi_2'$ (°)                            | 139.05        | 105.53             | -61.88             | -60.08             | 113.75              | 117.29              | 109.79            |
| $\chi_1'$ (°)                            | 172.40        | -45.06             | -59.87             | 167.88             | 179.92              | -64.09              | -53.30            |
| S-S Bond (Å)                             | 2.1           | 2.3                | 2.1                | 2.1                | 2.0                 | 2.0                 | 2.0               |
| C <sub>α</sub> Distance (Å)              | 5.2           | 4.9                | 5.0                | 4.9                | 4.9                 | 4.8                 | 5.1               |
| DSE (kJ mol <sup>-1</sup> ) <sup>g</sup> | 21.5          | 41.9               | 16.5               | 33.9               | 36.5                | 20.8                | 47.4              |
| Classification <sup>h</sup>              | (+)<br>RHHook | (-)<br>RHHook      | (-)<br>RHHook      | (+/-)<br>RHHook    | (+)<br>RHHook       | (-)<br>RHHook       | (-)<br>RHHook     |

<sup>a</sup> (Stams et al., 1998).

<sup>b</sup> (Pilka et al., 2008).

<sup>c</sup> (Alterio et al., 2009).

<sup>d</sup> (Whittington et al., 2001).

<sup>e</sup> (Whittington et al., 2004).

<sup>f</sup> (Huang et al., 1998).

<sup>g</sup> DSE calculated according to Eq. 10 in main text and torsion angles described in Fig. S1.

<sup>h</sup> Classification of the disulfide linkage at residues 23 and 203 (HCAII numbering). Symbols in parenthesis represent the magnitude of gauche values for  $\chi_1$  and  $\chi_1'$ . RH: Right-Handed.

## References

- Alterio, V., Hilvo, M., Di Fiore, A., Supuran, C. T., Pan, P., Parkkila, S., Scaloni, A., Pastorek, J., Pastorekova, S., Pedone, C., Scozzafava, A., Monti, S. M. & De Simone, G. (2009). *Proc Natl Acad Sci U S A* **106**, 16233-16238.
- Emsley, P. & Cowtan, K. (2004). *Acta Crystallogr D Biol Crystallogr* **60**, 2126-2132.
- Huang, S., Xue, Y., Sauer-Eriksson, E., Chirica, L. C., Lindskog, S. & Jonsson, B. H. (1998). *J Mol Biol* **283**, 301-310.
- Pilka, E. S., Kochan, G., Krysztowska, E., Muniz, J., Yue, W. W., Roos, A. K., von Delft, F., Arrowsmith, C. H., Weigelt, J., Edwards, A., Bountra, C. & Oppermann, U. (2008). Crystal structure of human carbonic anhydrase VI.
- Stams, T., Chen, Y., Boriack-Sjodin, P. A., Hurt, J. D., Liao, J., May, J. A., Dean, T., Laipis, P. J., Silverman, D. N. & Christianson, D. W. (1998). *Protein Sci.* **7**, 556-563.
- Whittington, D. A., Grubb, J. H., Waheed, A., Shah, G. N., Sly, W. S. & Christianson, D. W. (2004). *J Biol Chem* **279**, 7223-7228.
- Whittington, D. A., Waheed, A., Ulmasov, B., Shah, G. N., Grubb, J. H., Sly, W. S. & Christianson, D. W. (2001). *Proc Natl Acad Sci U S A* **98**, 9545-9550.
